# Supplementary material for: Multimodal AI for prediction of distant metastasis in carcinoma patients
Source: Front Bioinform. 2023 May 9;3:1131021. doi: 10.3389/fbinf.2023.1131021 (PMC10203594; doi:10.3389/fbinf.2023.1131021)
Supplement: Supplementary file 5 [file Table1.XLSX]

## Sheet: blca_gene_selection
Metastasis Barcode	No-Metastasis Barcode
TCGA-HQ-A5ND	TCGA-G2-A3IB
TCGA-G2-A2EK	TCGA-ZF-AA5N
TCGA-GC-A3BM	TCGA-FD-A6TF
TCGA-FD-A3SM	TCGA-GC-A3WC
TCGA-ZF-A9R1	TCGA-4Z-AA81
TCGA-FD-A6TH	TCGA-DK-A3X1
TCGA-K4-A83P	TCGA-ZF-AA4V
TCGA-DK-A3X2	TCGA-XF-AAMR
TCGA-FD-A43U	TCGA-E7-A6ME
TCGA-XF-AAMH	TCGA-E7-A8O7
TCGA-ZF-AA4T	TCGA-CF-A47X
TCGA-CF-A1HS	TCGA-ZF-A9RM
TCGA-XF-A9SU	TCGA-GD-A6C6
TCGA-2F-A9KP	TCGA-DK-A2I6
TCGA-DK-AA77	TCGA-XF-AAMZ
TCGA-2F-A9KR	TCGA-GV-A3JX
TCGA-GV-A40E	TCGA-UY-A9PA
TCGA-XF-A9SK	TCGA-4Z-AA7M
TCGA-FD-A6TE	TCGA-4Z-AA7O
TCGA-BT-A20T	TCGA-FD-A6TB
TCGA-FD-A62S	TCGA-UY-A9PD
TCGA-BL-A5ZZ	TCGA-ZF-A9RD
TCGA-CU-A3KJ	TCGA-HQ-A2OE
TCGA-K4-A4AC	TCGA-G2-AA3B
TCGA-BT-A20J	TCGA-CU-A3QU
TCGA-E7-A3X6	TCGA-HQ-A5NE
TCGA-2F-A9KW	TCGA-DK-A3IM
TCGA-CF-A1HR	TCGA-FD-A3B8
TCGA-GU-A42R	TCGA-R3-A69X
TCGA-XF-A9SV	TCGA-GD-A2C5
TCGA-G2-A2EL	TCGA-FJ-A871
TCGA-XF-AAMY	TCGA-E7-A85H
TCGA-ZF-AA56	TCGA-K4-A5RI
TCGA-DK-AA6S	TCGA-XF-AAMQ
TCGA-ZF-AA4U	TCGA-BL-A3JM
TCGA-XF-A9SY	TCGA-XF-A8HB
TCGA-DK-AA6Q	TCGA-DK-A3WY
TCGA-ZF-A9R9	TCGA-XF-AAML
TCGA-XF-A9SX	TCGA-DK-A3IK
TCGA-FD-A3SN	TCGA-BT-A20V
TCGA-E7-A7PW	TCGA-LT-A8JT
TCGA-GV-A3QG	TCGA-XF-AAMT
TCGA-DK-AA75	TCGA-4Z-AA7Y
TCGA-E5-A4U1	TCGA-BT-A20X
TCGA-FD-A3SL	TCGA-DK-A3IT
TCGA-XF-A9SZ	TCGA-FT-A61P
TCGA-FJ-A3ZE	TCGA-DK-AA6R
TCGA-UY-A9PE	TCGA-E5-A2PC
TCGA-DK-AA6L	TCGA-ZF-A9R5
TCGA-BT-A2LD	TCGA-XF-AAN7
TCGA-GV-A3QI	TCGA-E7-A6MD
TCGA-CU-A3YL	TCGA-XF-AAN5
TCGA-K4-A5RH	TCGA-FD-A3SP
TCGA-CF-A47T	TCGA-XF-AAN0
TCGA-4Z-AA82	TCGA-LC-A66R
TCGA-4Z-AA87	TCGA-KQ-A41O
TCGA-ZF-A9RN	TCGA-XF-AAMX
TCGA-E7-A4IJ	TCGA-XF-AAMW
TCGA-ZF-A9R3	TCGA-XF-A9T3
TCGA-UY-A8OC	TCGA-DK-A6B6
TCGA-ZF-AA4W	TCGA-KQ-A41Q
TCGA-FD-A3B7	TCGA-DK-AA76
TCGA-G2-A2EJ	TCGA-XF-A9T5
TCGA-H4-A2HQ	TCGA-BL-A13I
TCGA-DK-A2I2	TCGA-UY-A78K
TCGA-XF-A8HI	TCGA-LT-A5Z6
TCGA-ZF-AA5H	TCGA-CF-A3MF
TCGA-DK-AA6P	TCGA-DK-A1AA
TCGA-UY-A78N	TCGA-DK-A1AB
TCGA-XF-A9T4	TCGA-KQ-A41R
TCGA-G2-A2EC	TCGA-BT-A42E
TCGA-DK-A3IU	TCGA-PQ-A6FI
TCGA-XF-A8HG	TCGA-MV-A51V
TCGA-BT-A20Q	TCGA-BT-A20O
TCGA-DK-A6B2	TCGA-FD-A3SS
TCGA-GV-A3JW	TCGA-FD-A5C1
TCGA-FD-A3SJ	TCGA-E7-A678
TCGA-2F-A9KO	TCGA-FD-A5BX
TCGA-GU-A763	TCGA-DK-AA6T
TCGA-DK-AA6W	TCGA-YC-A8S6

## Sheet: paad_gene_selection
Metastasis Barcode	No-Metastasis Barcode
TCGA-2J-AAB9	TCGA-HZ-8315
TCGA-PZ-A5RE	TCGA-3A-A9IX
TCGA-XN-A8T5	TCGA-S4-A8RP
TCGA-US-A774	TCGA-F2-7276
TCGA-IB-7644	TCGA-RL-AAAS
TCGA-IB-7645	TCGA-IB-7651
TCGA-3E-AAAY	TCGA-F2-6880
TCGA-US-A77E	TCGA-LB-A9Q5
TCGA-XD-AAUI	TCGA-IB-A7M4
TCGA-F2-7273	TCGA-HZ-A49H
TCGA-S4-A8RO	TCGA-3A-A9IJ
TCGA-3A-A9IU	TCGA-US-A77G
TCGA-IB-7893	TCGA-2L-AAQA
TCGA-2J-AABH	TCGA-FB-AAPS
TCGA-HZ-7918	TCGA-HZ-A49G
TCGA-2J-AAB6	TCGA-IB-A5SO
TCGA-IB-AAUO	TCGA-FB-AAQ1
TCGA-3A-A9IH	TCGA-IB-AAUN
TCGA-XN-A8T3	TCGA-HZ-8317
TCGA-H8-A6C1	TCGA-3A-A9IV
TCGA-HZ-7924	TCGA-FB-A78T
TCGA-L1-A7W4	TCGA-2J-AABE
TCGA-2J-AABI	TCGA-HZ-A4BH
TCGA-IB-7647	TCGA-IB-7652
TCGA-2J-AABU	TCGA-US-A776
TCGA-HV-AA8V	TCGA-US-A779
TCGA-HZ-7926	TCGA-IB-A6UG
TCGA-IB-A7LX	TCGA-IB-AAUM
TCGA-HV-A7OP	TCGA-2J-AABK
TCGA-RB-AA9M	TCGA-HV-A5A5
TCGA-IB-A5SS	TCGA-F2-A44G
TCGA-2J-AABF	TCGA-3A-A9IN
TCGA-H6-8124	TCGA-FB-AAPQ
TCGA-2J-AABV	TCGA-FB-A4P6
TCGA-3A-A9J0	TCGA-FB-AAQ0
TCGA-OE-A75W	TCGA-FB-A4P5
TCGA-2J-AABA	TCGA-IB-7654
TCGA-F2-6879	TCGA-HZ-7919
TCGA-FB-AAPP	TCGA-F2-A8YN
TCGA-FB-A5VM	TCGA-FB-AAPU
TCGA-IB-7649	TCGA-IB-8127
TCGA-IB-7888	TCGA-HV-A5A4
TCGA-IB-AAUQ	TCGA-HZ-A49I
TCGA-2J-AABR	TCGA-XD-AAUL
TCGA-IB-7891	TCGA-IB-AAUV
TCGA-HV-AA8X	TCGA-3E-AAAZ
TCGA-HZ-8003	TCGA-HZ-A77O
TCGA-IB-A6UF	TCGA-HZ-8636
TCGA-HZ-A9TJ	TCGA-3A-A9IO
TCGA-FB-AAPZ	TCGA-3A-A9IL
TCGA-FB-AAQ2	TCGA-2J-AABT
TCGA-IB-8126	TCGA-HZ-A8P0
TCGA-HV-A7OL	TCGA-Q3-AA2A
TCGA-HZ-7289	TCGA-HZ-A4BK
TCGA-IB-7890	TCGA-YY-A8LH
TCGA-IB-A5SQ	TCGA-HV-A5A3
TCGA-FB-A545	TCGA-HZ-8519
TCGA-HV-A5A6	TCGA-IB-7897

## Sheet: hnsc_gene_selection
Metastasis Barcode	No-Metastasis Barcode
TCGA-P3-A6T6	TCGA-D6-A4ZB
TCGA-QK-A6IF	TCGA-CV-7435
TCGA-CN-A49A	TCGA-CR-7370
TCGA-T3-A92M	TCGA-HL-7533
TCGA-HD-8224	TCGA-CR-7398
TCGA-BB-A5HZ	TCGA-CV-A464
TCGA-CV-7250	TCGA-CV-A45R
TCGA-HD-7831	TCGA-CV-A463
TCGA-T3-A92N	TCGA-CV-6433
TCGA-BA-A6D8	TCGA-RS-A6TP
TCGA-QK-A6IH	TCGA-CN-6994
TCGA-KU-A66S	TCGA-CV-6441
TCGA-MT-A7BN	TCGA-CN-5365
TCGA-MZ-A7D7	TCGA-WA-A7H4
TCGA-BB-A5HY	TCGA-MT-A67D
TCGA-CN-6013	TCGA-CN-6997
TCGA-P3-A6T3	TCGA-CR-7367
TCGA-CQ-A4CH	TCGA-CR-6472
TCGA-CV-7433	TCGA-CV-5442
TCGA-CN-6989	TCGA-CR-7390
TCGA-BB-7871	TCGA-CV-7248
TCGA-QK-A8Z9	TCGA-D6-6825
TCGA-MZ-A6I9	TCGA-D6-6516
TCGA-T2-A6WZ	TCGA-BB-A5HU

## Sheet: blca_multimodal
Metastasis Barcodes	No Metastasis Barcodes
TCGA-2F-A9KR	TCGA-FJ-A3ZF
TCGA-FD-A3SL	TCGA-BT-A42C
TCGA-XF-A8HI	TCGA-FD-A43P
TCGA-UY-A9PE	TCGA-CF-A27C
TCGA-DK-A3IU	TCGA-FD-A5BT
TCGA-XF-A9T4	TCGA-DK-A3IM
TCGA-FJ-A3ZE	TCGA-ZF-AA4N
TCGA-GV-A40E	TCGA-5N-A9KI
TCGA-DK-A6B2	TCGA-ZF-AA52
TCGA-BT-A2LD	TCGA-BL-A0C8
TCGA-ZF-AA4T	TCGA-UY-A9PH
TCGA-4Z-AA87	TCGA-E7-A519
TCGA-XF-A8HG	TCGA-DK-A1AG
TCGA-E7-A7PW	TCGA-XF-A9SW
TCGA-G2-A2EK	TCGA-GU-A42P
TCGA-GV-A3QI	TCGA-G2-A3IE
TCGA-XF-AAMH	TCGA-CF-A47Y
TCGA-G2-A2EL	TCGA-GC-A3RD
TCGA-E7-A4IJ	TCGA-FD-A6TG
TCGA-CU-A3YL	TCGA-GC-A3YS
TCGA-XF-A9SU	TCGA-FJ-A3Z9
TCGA-2F-A9KW	TCGA-FD-A62N
TCGA-FD-A3SN	TCGA-XF-AAN1
TCGA-FD-A6TH	TCGA-4Z-AA7Q
TCGA-BT-A20T	TCGA-CU-A0YO
TCGA-UY-A78N	TCGA-GD-A3OQ
TCGA-CU-A3KJ	TCGA-DK-A3IN
TCGA-FD-A3SJ	TCGA-GV-A3JZ
TCGA-K4-A5RH	TCGA-YF-AA3M
TCGA-GV-A3QG	TCGA-S5-AA26
TCGA-GV-A3JW	TCGA-2F-A9KT
TCGA-CF-A1HS	TCGA-GU-A767
TCGA-FD-A6TE	TCGA-FD-A3N6
TCGA-ZF-A9R3	TCGA-FD-A3B4
TCGA-G2-A2EC	TCGA-GU-A42Q
TCGA-HQ-A5ND	TCGA-DK-A6B0
TCGA-XF-A9SY	TCGA-ZF-A9R7
TCGA-FD-A43U	TCGA-UY-A8OB
TCGA-XF-A9SZ	TCGA-CF-A47S
TCGA-ZF-A9R9	TCGA-ZF-A9RD
TCGA-FD-A3SM	TCGA-FD-A3B6
TCGA-E5-A4U1	TCGA-E7-A5KF
TCGA-XF-A9SK	TCGA-HQ-A2OF
TCGA-FD-A3B7	TCGA-FD-A43X
TCGA-XF-A9SX	TCGA-YF-AA3L
TCGA-XF-A9SV	TCGA-GD-A3OP
TCGA-K4-A83P	TCGA-CF-A5UA
TCGA-ZF-A9RN	TCGA-CF-A5U8
TCGA-ZF-A9R1	TCGA-DK-A1AC
TCGA-BL-A5ZZ	TCGA-E7-A677
	TCGA-G2-AA3D
	TCGA-ZF-AA54
	TCGA-DK-A2HX
	TCGA-SY-A9G0
	TCGA-UY-A78L

## Sheet: paad_multimodal
Metastasis Barcode	No metastasis Barcode
TCGA-HV-A7OL	TCGA-FB-A4P6
TCGA-IB-7647	TCGA-HZ-8636
TCGA-IB-A6UF	TCGA-Z5-AAPL
TCGA-HV-A5A6	TCGA-HZ-8519
TCGA-2J-AABA	TCGA-2J-AABP
TCGA-2J-AABH	TCGA-2L-AAQI
TCGA-IB-7893	TCGA-HV-A5A3
TCGA-2J-AABF	TCGA-F2-7276
TCGA-IB-A5SQ	TCGA-HZ-7922
TCGA-FB-AAQ2	TCGA-F2-A8YN
TCGA-HZ-7289	TCGA-3A-A9IO
TCGA-3A-A9J0	TCGA-XD-AAUG
TCGA-IB-7890	TCGA-HZ-A49H
TCGA-IB-8126	TCGA-IB-AAUS
TCGA-US-A77E	TCGA-HZ-8315
TCGA-IB-AAUO	TCGA-IB-A5SO
TCGA-HV-AA8V	TCGA-Q3-A5QY
TCGA-S4-A8RO	TCGA-IB-A5ST
TCGA-3A-A9IU	TCGA-HV-A5A4
TCGA-2J-AAB9	TCGA-US-A77G
TCGA-FB-AAPP	TCGA-IB-7897
TCGA-US-A774	TCGA-FB-AAQ3
TCGA-H8-A6C1	TCGA-3A-A9IR
TCGA-FB-AAPZ	TCGA-IB-7886
TCGA-L1-A7W4	TCGA-HV-A5A5
TCGA-IB-A7LX	TCGA-RB-A7B8
TCGA-HZ-7924	TCGA-HZ-A8P0
TCGA-RB-AA9M	TCGA-FB-AAPU
TCGA-2J-AAB6	TCGA-IB-7654
TCGA-OE-A75W	TCGA-2J-AAB1
TCGA-XN-A8T5	TCGA-HZ-A49I
TCGA-HZ-7918	TCGA-XD-AAUH
TCGA-2J-AABU	TCGA-3A-A9IC
TCGA-HV-A7OP	TCGA-XD-AAUL
TCGA-HZ-A9TJ	TCGA-S4-A8RP
TCGA-XD-AAUI	TCGA-US-A776
TCGA-HZ-7926	TCGA-3A-A9IV
TCGA-2J-AABV	TCGA-IB-AAUP
TCGA-HV-AA8X	TCGA-IB-7889
TCGA-PZ-A5RE	TCGA-2L-AAQE
TCGA-2J-AABI	TCGA-HZ-A77P
TCGA-3A-A9IH	TCGA-FB-AAPY
TCGA-2J-AABR	TCGA-IB-AAUV
TCGA-F2-6879	TCGA-3A-A9IX
	TCGA-2L-AAQL
	TCGA-HZ-A49G
	TCGA-H6-A45N
	TCGA-HZ-A4BH
	TCGA-2J-AAB4
	TCGA-HZ-A8P1
	TCGA-IB-AAUW

## Sheet: all3_multimodal
Metastasis Barcode	No Metastasis Barcode
TCGA-T3-A92N	TCGA-CV-A45R
TCGA-CV-7250	TCGA-CV-7428
TCGA-P3-A6T3	TCGA-CV-7416
TCGA-HD-7831	TCGA-D6-A6EK
TCGA-QK-A8Z9	TCGA-CQ-A4CE
TCGA-CN-6989	TCGA-CN-4729
TCGA-MT-A7BN	TCGA-RS-A6TP
TCGA-QK-A6IF	TCGA-CQ-5323
TCGA-MZ-A6I9	TCGA-CV-5970
TCGA-KU-A66S	TCGA-CV-6961
TCGA-CV-7433	TCGA-UF-A7JH
TCGA-QK-A6IH	TCGA-IQ-A61I
TCGA-T2-A6WZ	TCGA-D6-6826
TCGA-MZ-A7D7	TCGA-CN-6018
TCGA-T3-A92M	TCGA-CV-7103
TCGA-BA-A6D8	TCGA-UF-A7JA
TCGA-BB-A5HZ	TCGA-CQ-5326
TCGA-BB-A5HY	TCGA-HD-7832
TCGA-HV-A7OL	TCGA-UF-A719
TCGA-IB-7647	TCGA-CV-7430
TCGA-IB-A6UF	TCGA-CV-7252
TCGA-HV-A5A6	TCGA-CN-A63V
TCGA-2J-AABA	TCGA-FB-A4P6
TCGA-2J-AABH	TCGA-HZ-8636
TCGA-IB-7893	TCGA-Z5-AAPL
TCGA-2J-AABF	TCGA-HZ-8519
TCGA-IB-A5SQ	TCGA-2J-AABP
TCGA-FB-AAQ2	TCGA-2L-AAQI
TCGA-HZ-7289	TCGA-HV-A5A3
TCGA-3A-A9J0	TCGA-F2-7276
TCGA-IB-7890	TCGA-HZ-7922
TCGA-IB-8126	TCGA-F2-A8YN
TCGA-US-A77E	TCGA-3A-A9IO
TCGA-IB-AAUO	TCGA-XD-AAUG
TCGA-HV-AA8V	TCGA-HZ-A49H
TCGA-S4-A8RO	TCGA-IB-AAUS
TCGA-3A-A9IU	TCGA-HZ-8315
TCGA-2J-AAB9	TCGA-IB-A5SO
TCGA-FB-AAPP	TCGA-Q3-A5QY
TCGA-US-A774	TCGA-IB-A5ST
TCGA-H8-A6C1	TCGA-HV-A5A4
TCGA-FB-AAPZ	TCGA-US-A77G
TCGA-L1-A7W4	TCGA-IB-7897
TCGA-IB-A7LX	TCGA-FB-AAQ3
TCGA-HZ-7924	TCGA-3A-A9IR
TCGA-RB-AA9M	TCGA-IB-7886
TCGA-2J-AAB6	TCGA-HV-A5A5
TCGA-OE-A75W	TCGA-RB-A7B8
TCGA-XN-A8T5	TCGA-HZ-A8P0
TCGA-HZ-7918	TCGA-FB-AAPU
TCGA-2J-AABU	TCGA-IB-7654
TCGA-HV-A7OP	TCGA-2J-AAB1
TCGA-HZ-A9TJ	TCGA-HZ-A49I
TCGA-XD-AAUI	TCGA-XD-AAUH
TCGA-HZ-7926	TCGA-3A-A9IC
TCGA-2J-AABV	TCGA-XD-AAUL
TCGA-HV-AA8X	TCGA-S4-A8RP
TCGA-PZ-A5RE	TCGA-US-A776
TCGA-2J-AABI	TCGA-3A-A9IV
TCGA-3A-A9IH	TCGA-IB-AAUP
TCGA-2J-AABR	TCGA-IB-7889
TCGA-F2-6879	TCGA-2L-AAQE
TCGA-2F-A9KR	TCGA-HZ-A77P
TCGA-FD-A3SL	TCGA-FB-AAPY
TCGA-XF-A8HI	TCGA-IB-AAUV
TCGA-UY-A9PE	TCGA-3A-A9IX
TCGA-DK-A3IU	TCGA-2L-AAQL
TCGA-XF-A9T4	TCGA-HZ-A49G
TCGA-FJ-A3ZE	TCGA-H6-A45N
TCGA-GV-A40E	TCGA-HZ-A4BH
TCGA-DK-A6B2	TCGA-2J-AAB4
TCGA-BT-A2LD	TCGA-HZ-A8P1
TCGA-ZF-AA4T	TCGA-IB-AAUW
TCGA-4Z-AA87	TCGA-FJ-A3ZF
TCGA-XF-A8HG	TCGA-BT-A42C
TCGA-E7-A7PW	TCGA-FD-A43P
TCGA-G2-A2EK	TCGA-CF-A27C
TCGA-GV-A3QI	TCGA-FD-A5BT
TCGA-XF-AAMH	TCGA-DK-A3IM
TCGA-G2-A2EL	TCGA-ZF-AA4N
TCGA-E7-A4IJ	TCGA-5N-A9KI
TCGA-CU-A3YL	TCGA-ZF-AA52
TCGA-XF-A9SU	TCGA-BL-A0C8
TCGA-2F-A9KW	TCGA-UY-A9PH
TCGA-FD-A3SN	TCGA-E7-A519
TCGA-FD-A6TH	TCGA-DK-A1AG
TCGA-BT-A20T	TCGA-XF-A9SW
TCGA-UY-A78N	TCGA-GU-A42P
TCGA-CU-A3KJ	TCGA-G2-A3IE
TCGA-FD-A3SJ	TCGA-CF-A47Y
TCGA-K4-A5RH	TCGA-GC-A3RD
TCGA-GV-A3QG	TCGA-FD-A6TG
TCGA-GV-A3JW	TCGA-GC-A3YS
TCGA-CF-A1HS	TCGA-FJ-A3Z9
TCGA-FD-A6TE	TCGA-FD-A62N
TCGA-ZF-A9R3	TCGA-XF-AAN1
TCGA-G2-A2EC	TCGA-4Z-AA7Q
TCGA-HQ-A5ND	TCGA-CU-A0YO
TCGA-XF-A9SY	TCGA-GD-A3OQ
TCGA-FD-A43U	TCGA-DK-A3IN
TCGA-XF-A9SZ	TCGA-GV-A3JZ
TCGA-ZF-A9R9	TCGA-YF-AA3M
TCGA-FD-A3SM	TCGA-S5-AA26
TCGA-E5-A4U1	TCGA-2F-A9KT
TCGA-XF-A9SK	TCGA-GU-A767
TCGA-FD-A3B7	TCGA-FD-A3N6
TCGA-XF-A9SX	TCGA-FD-A3B4
TCGA-XF-A9SV	TCGA-GU-A42Q
TCGA-K4-A83P	TCGA-DK-A6B0
TCGA-ZF-A9RN	TCGA-ZF-A9R7
TCGA-ZF-A9R1	TCGA-UY-A8OB
TCGA-BL-A5ZZ	TCGA-CF-A47S
	TCGA-ZF-A9RD
	TCGA-FD-A3B6
	TCGA-E7-A5KF
	TCGA-HQ-A2OF
	TCGA-FD-A43X
	TCGA-YF-AA3L
	TCGA-GD-A3OP
	TCGA-CF-A5UA
	TCGA-CF-A5U8
	TCGA-DK-A1AC
	TCGA-E7-A677
	TCGA-G2-AA3D
	TCGA-ZF-AA54
	TCGA-DK-A2HX
	TCGA-SY-A9G0
	TCGA-UY-A78L
